# Supplementary material for: Informed baseline subtraction of proteomic mass spectrometry data aided by a novel sliding window algorithm
Source: PubMed Central journal article supplement (PMC5142289; doi:10.1186/s12953-016-0107-8), 2016-12-07
Supplement: 12953_2016_107_MOESM2_ESM.pdf [file 12953_2016_107_MOESM2_ESM.pdf]

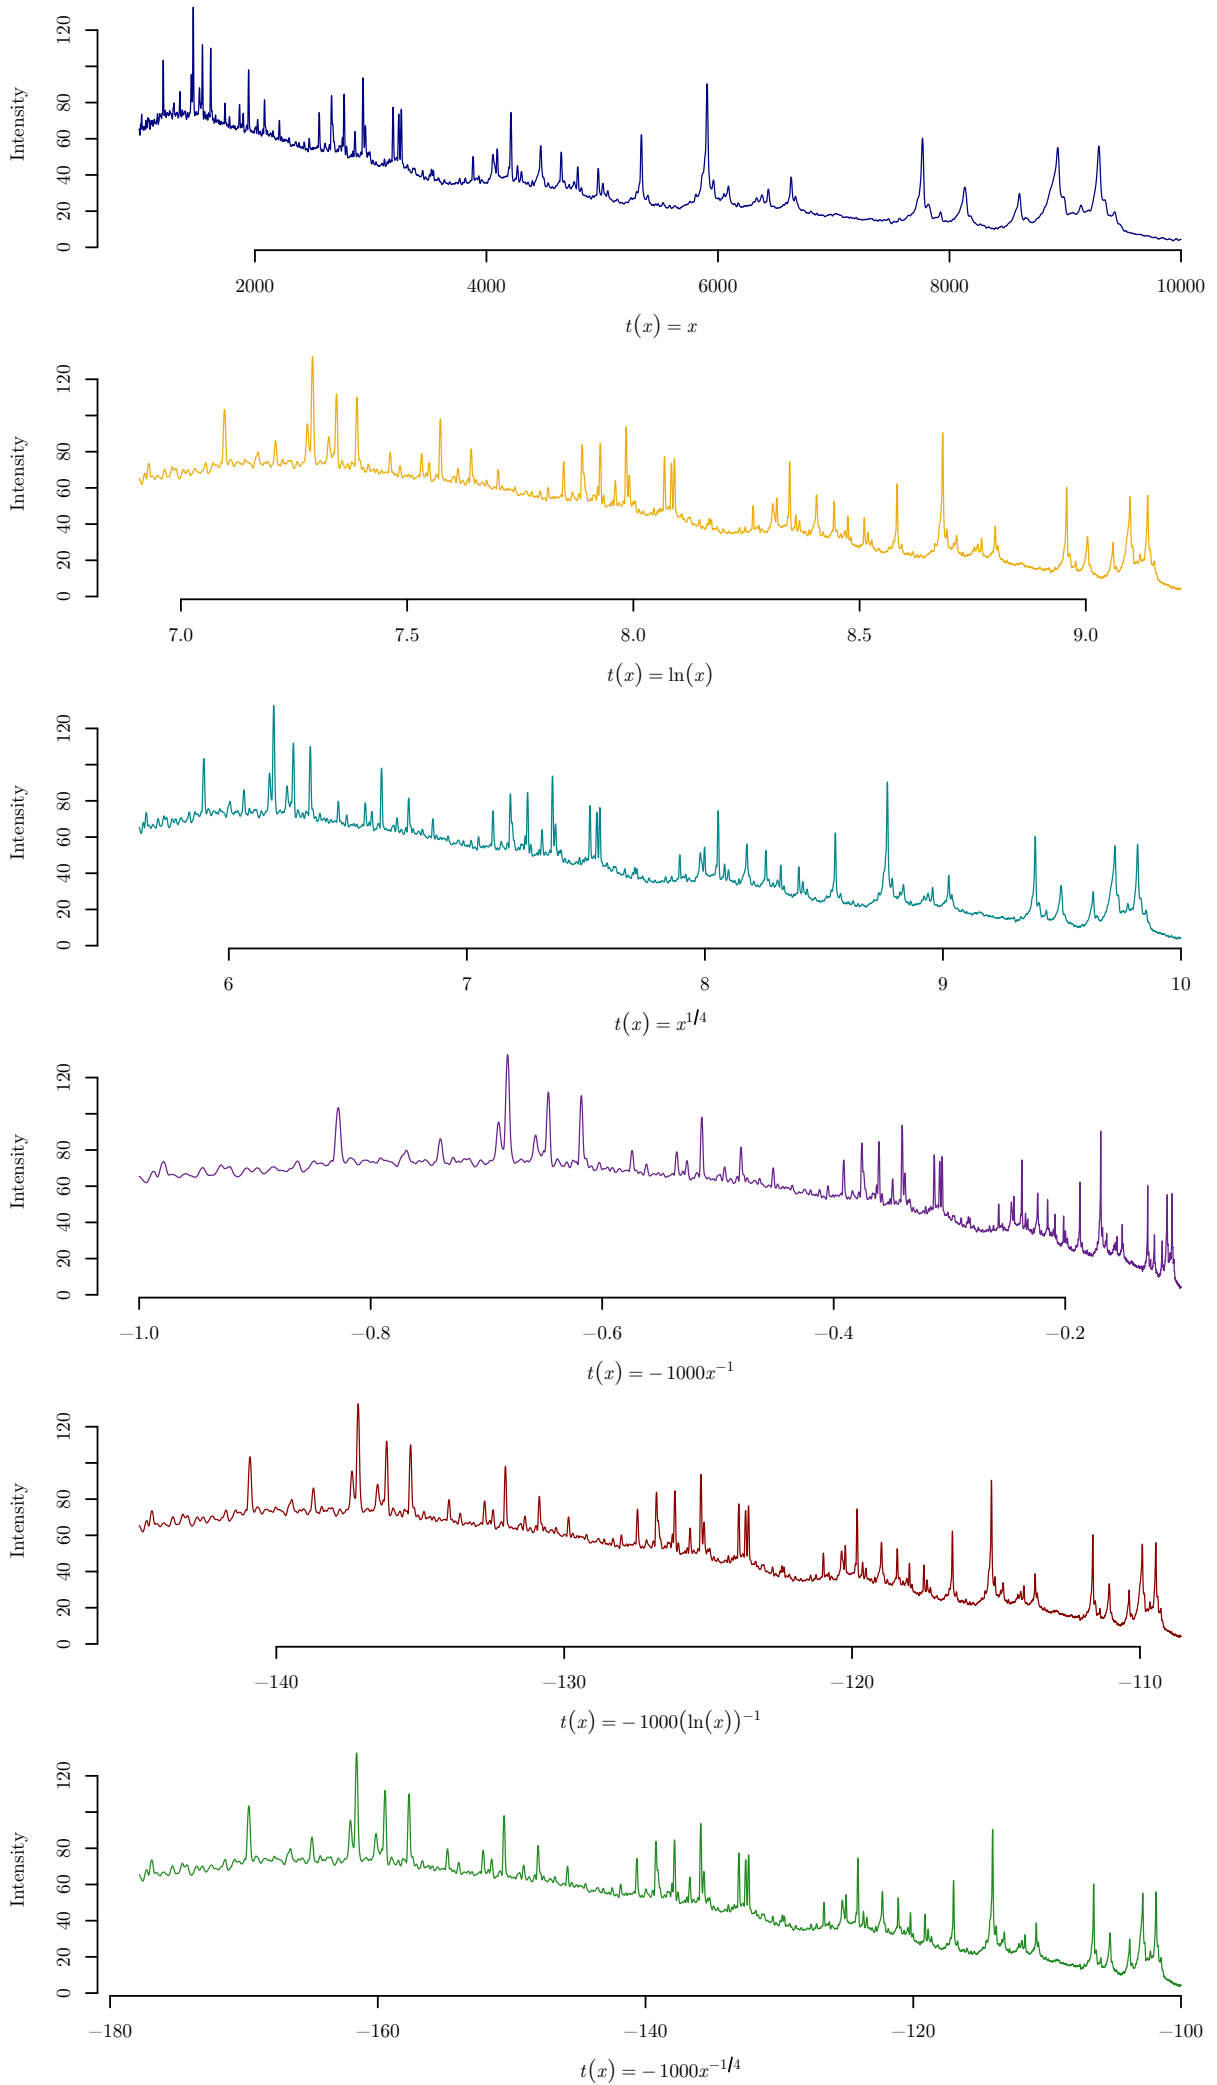

**Figure 1:** The effect of the six transformation functions,  $t_0$ - $t_5$ , on a spectrum from the Fiedler dataset.

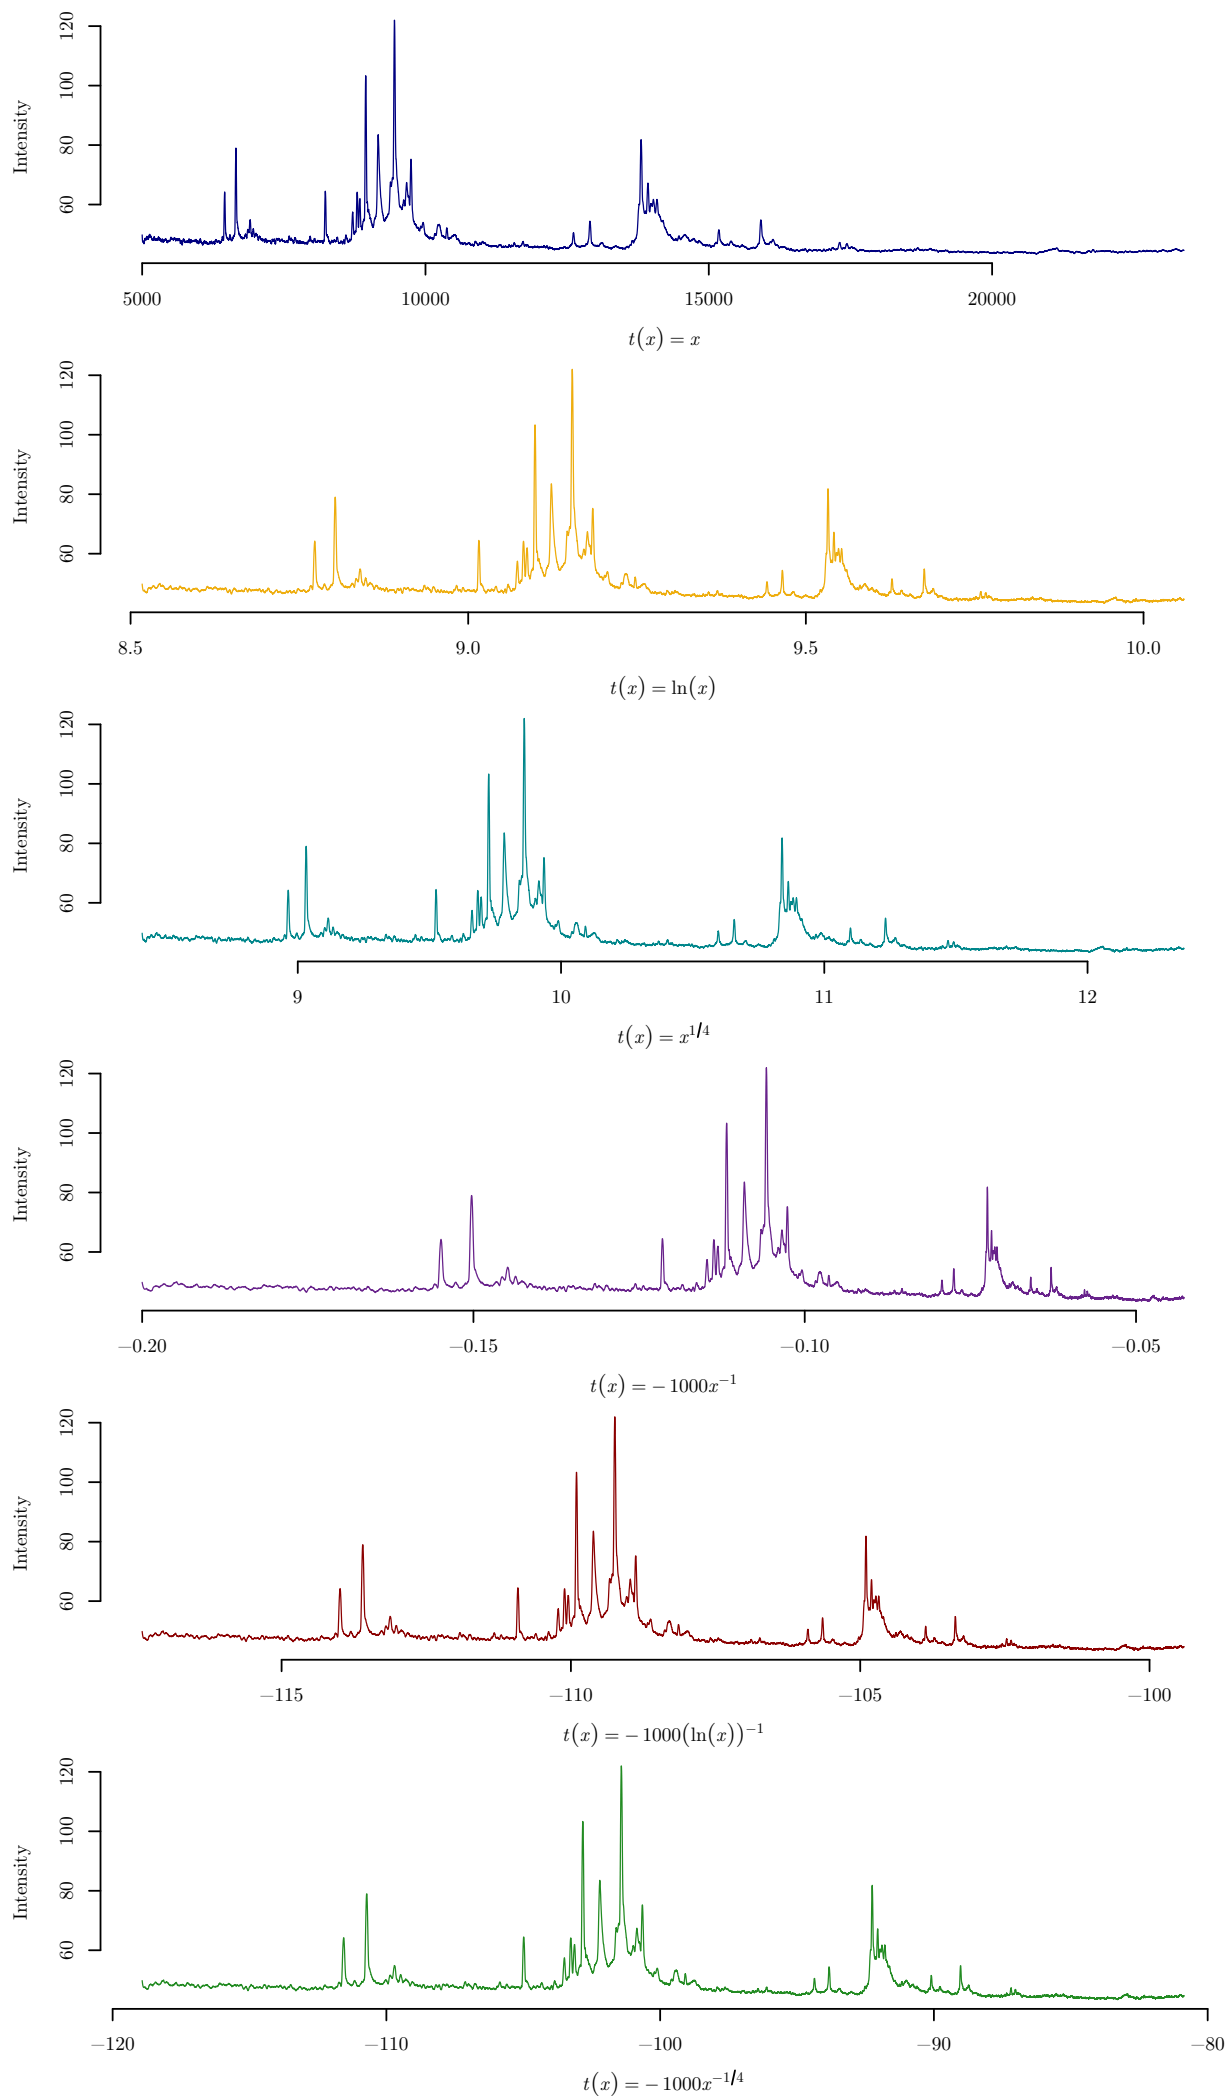

**Figure 2:** The effect of the six transformation functions,  $t_0$ - $t_5$ , on a spectrum from the Yildiz dataset.

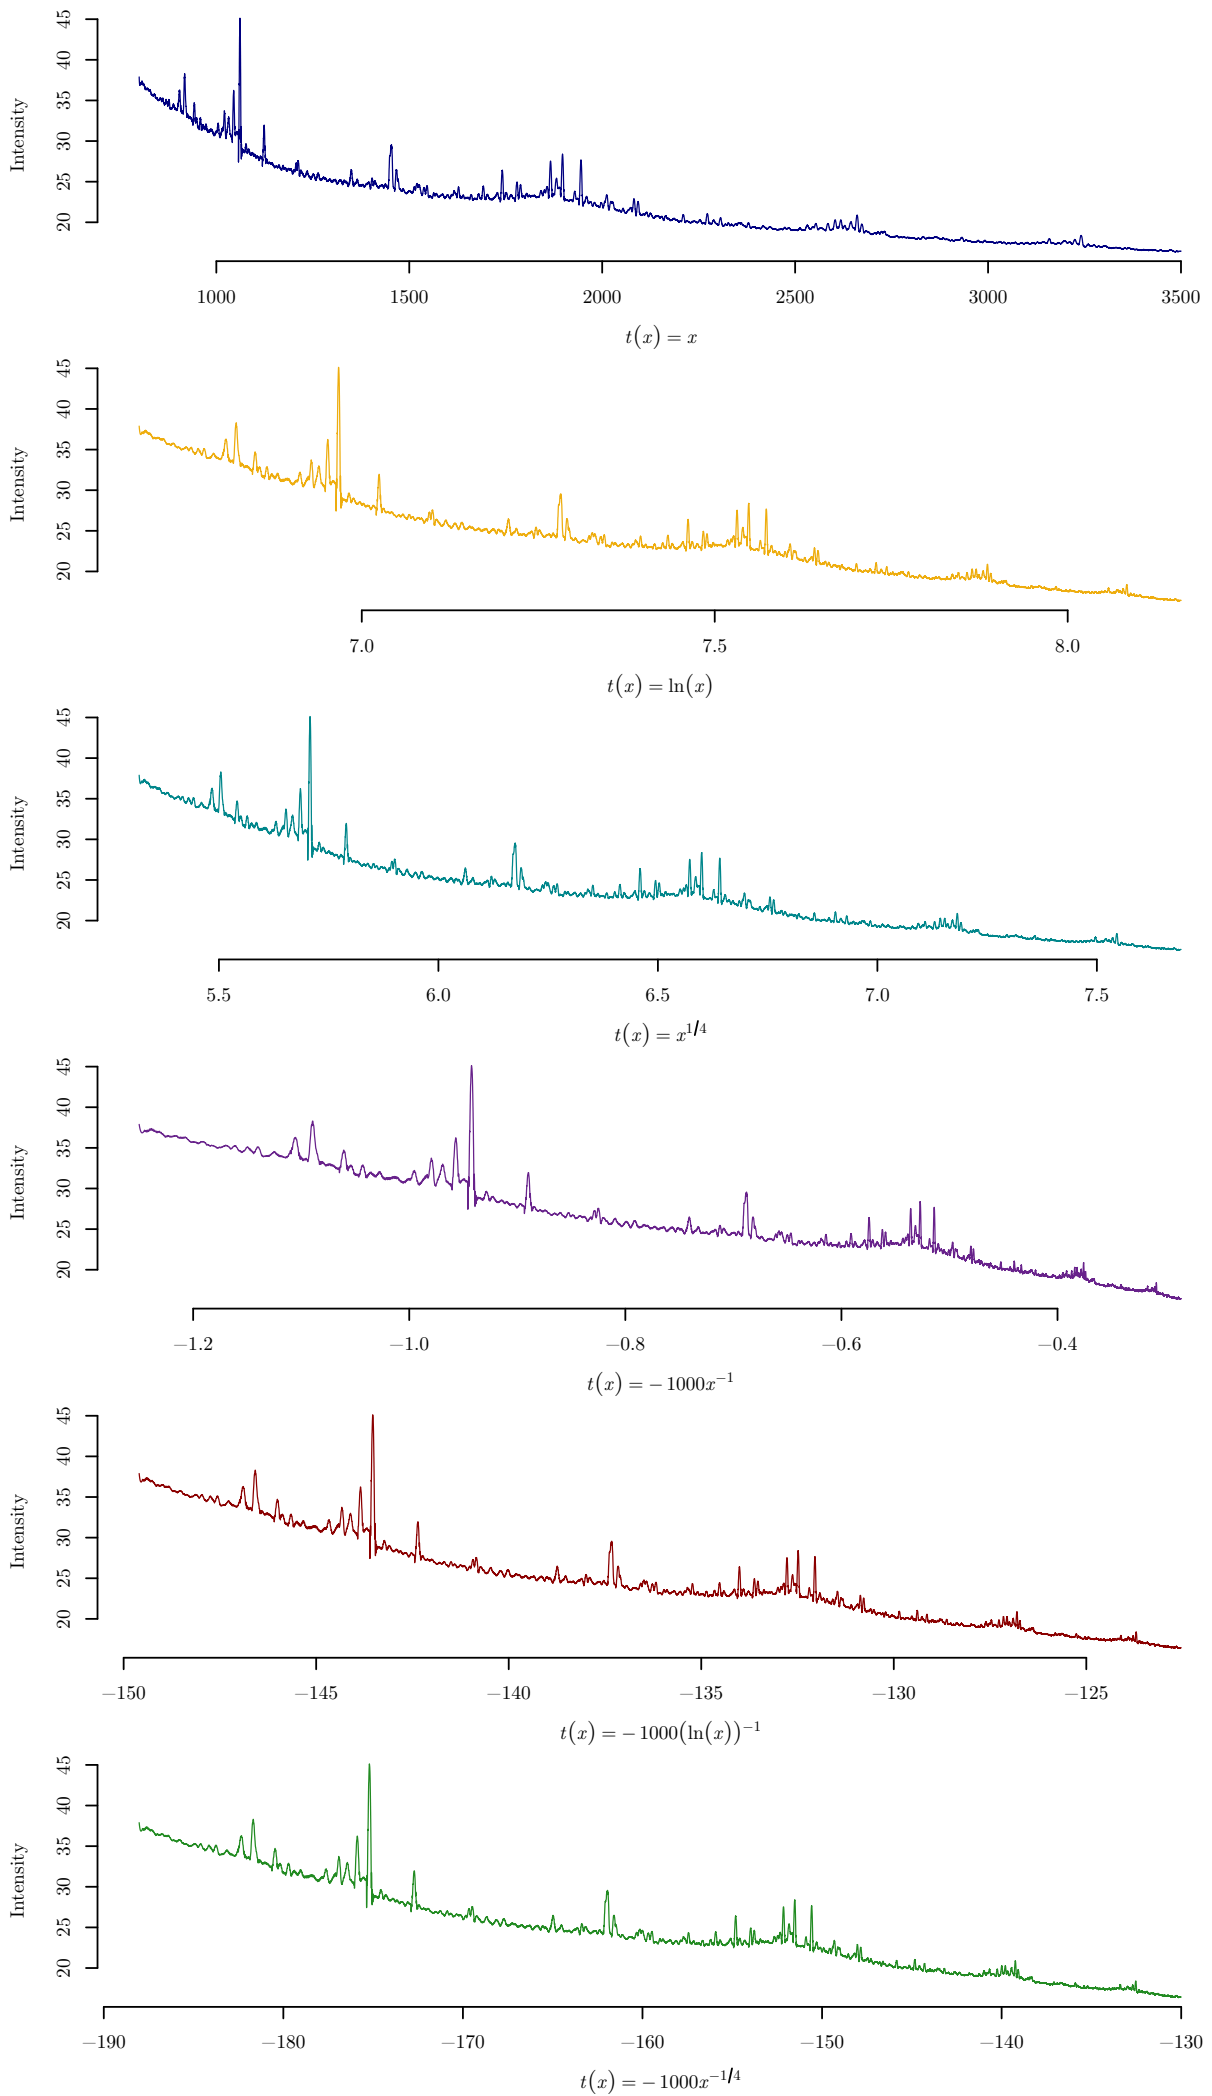

**Figure 3:** The effect of the six transformation functions,  $t_0$ - $t_5$ , on a spectrum from the Wu dataset.

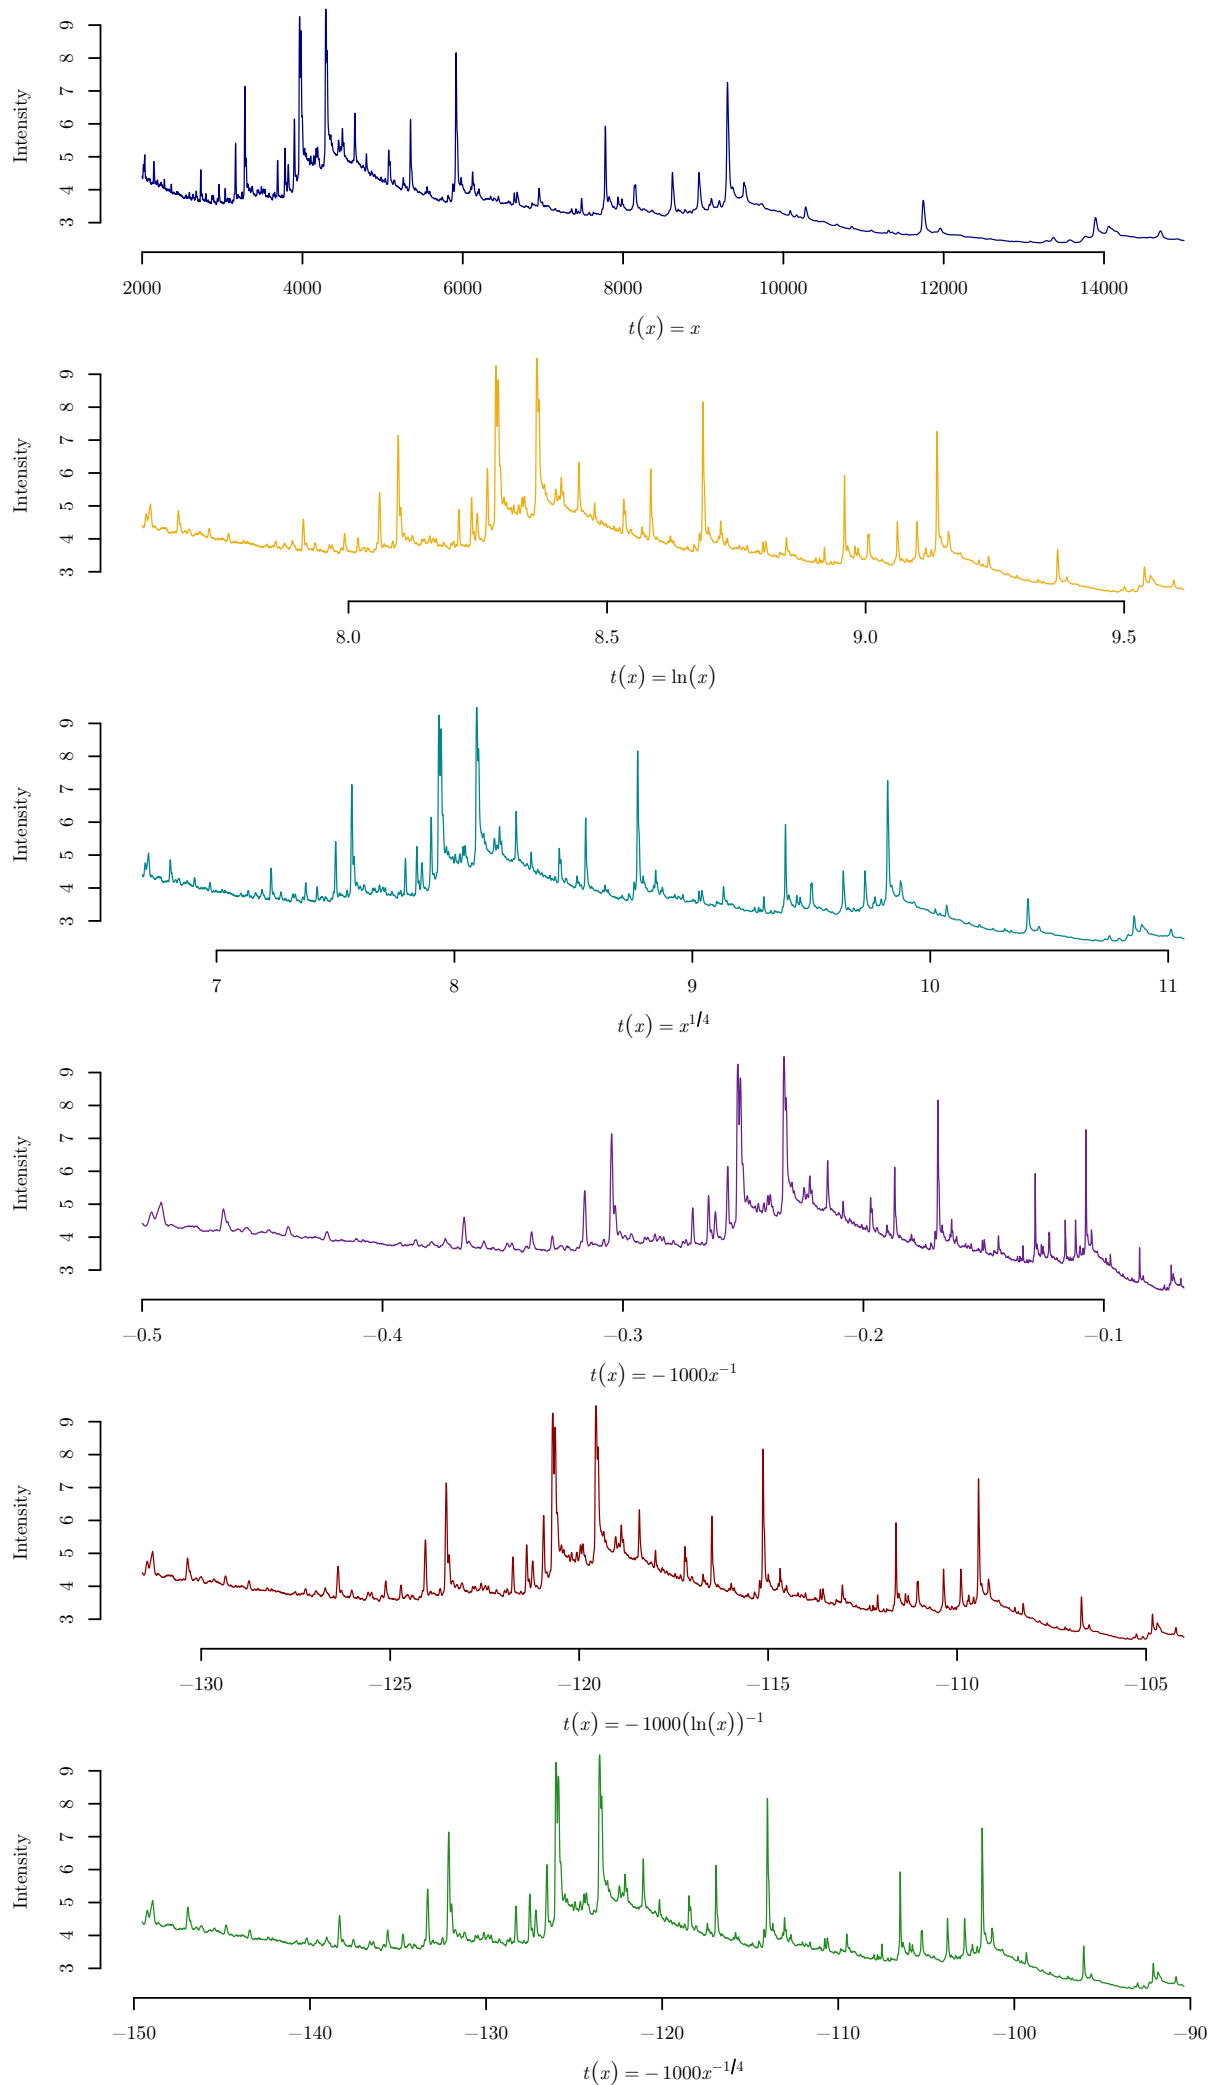

**Figure 4:** The effect of the six transformation functions,  $t_0$ - $t_5$ , on a spectrum from the Adam dataset.

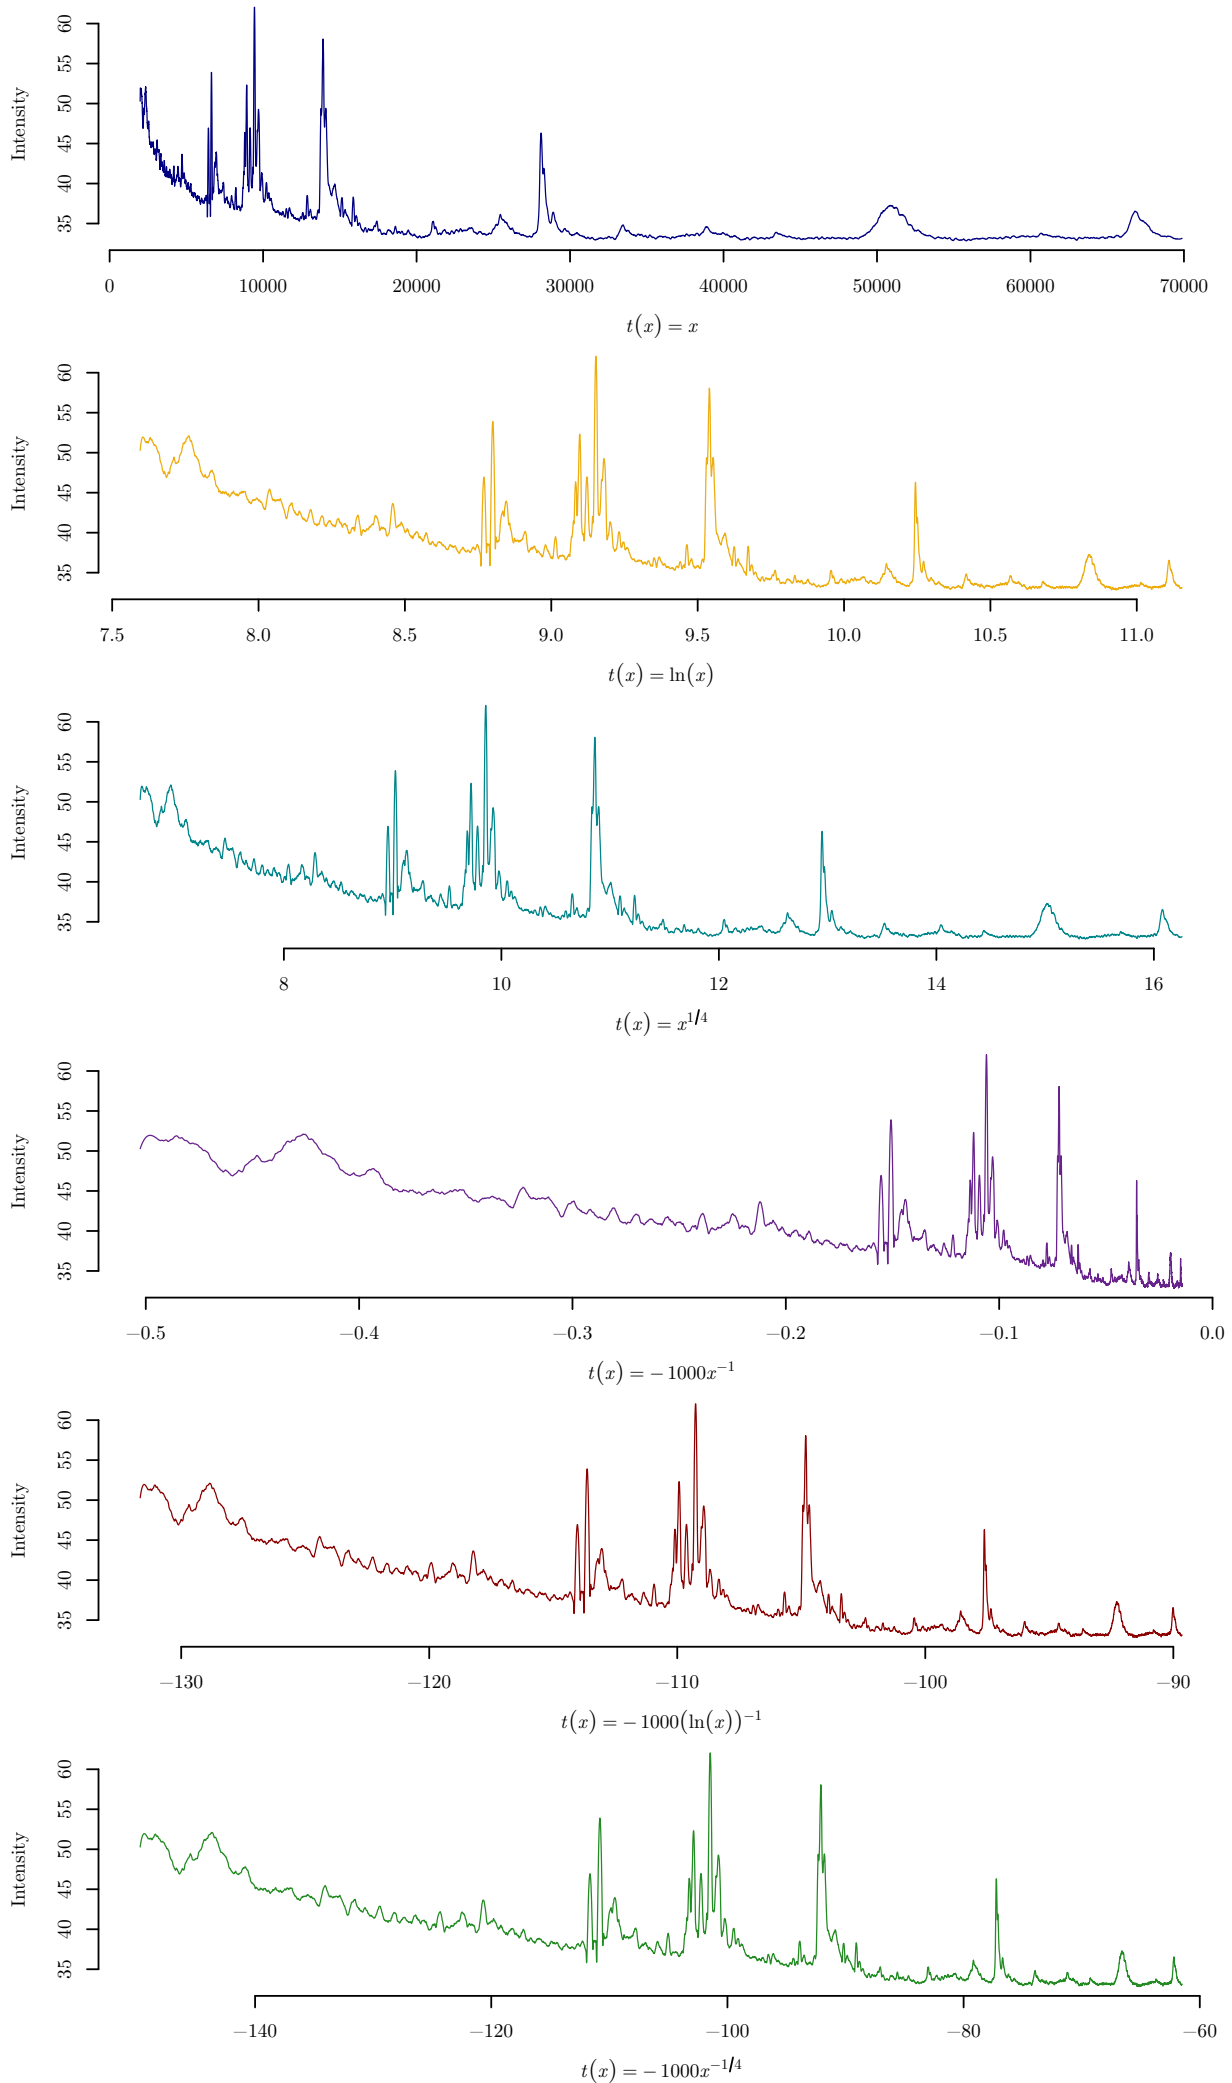

**Figure 5:** The effect of the six transformation functions,  $t_0$ - $t_5$ , on a spectrum from the Taguchi dataset.

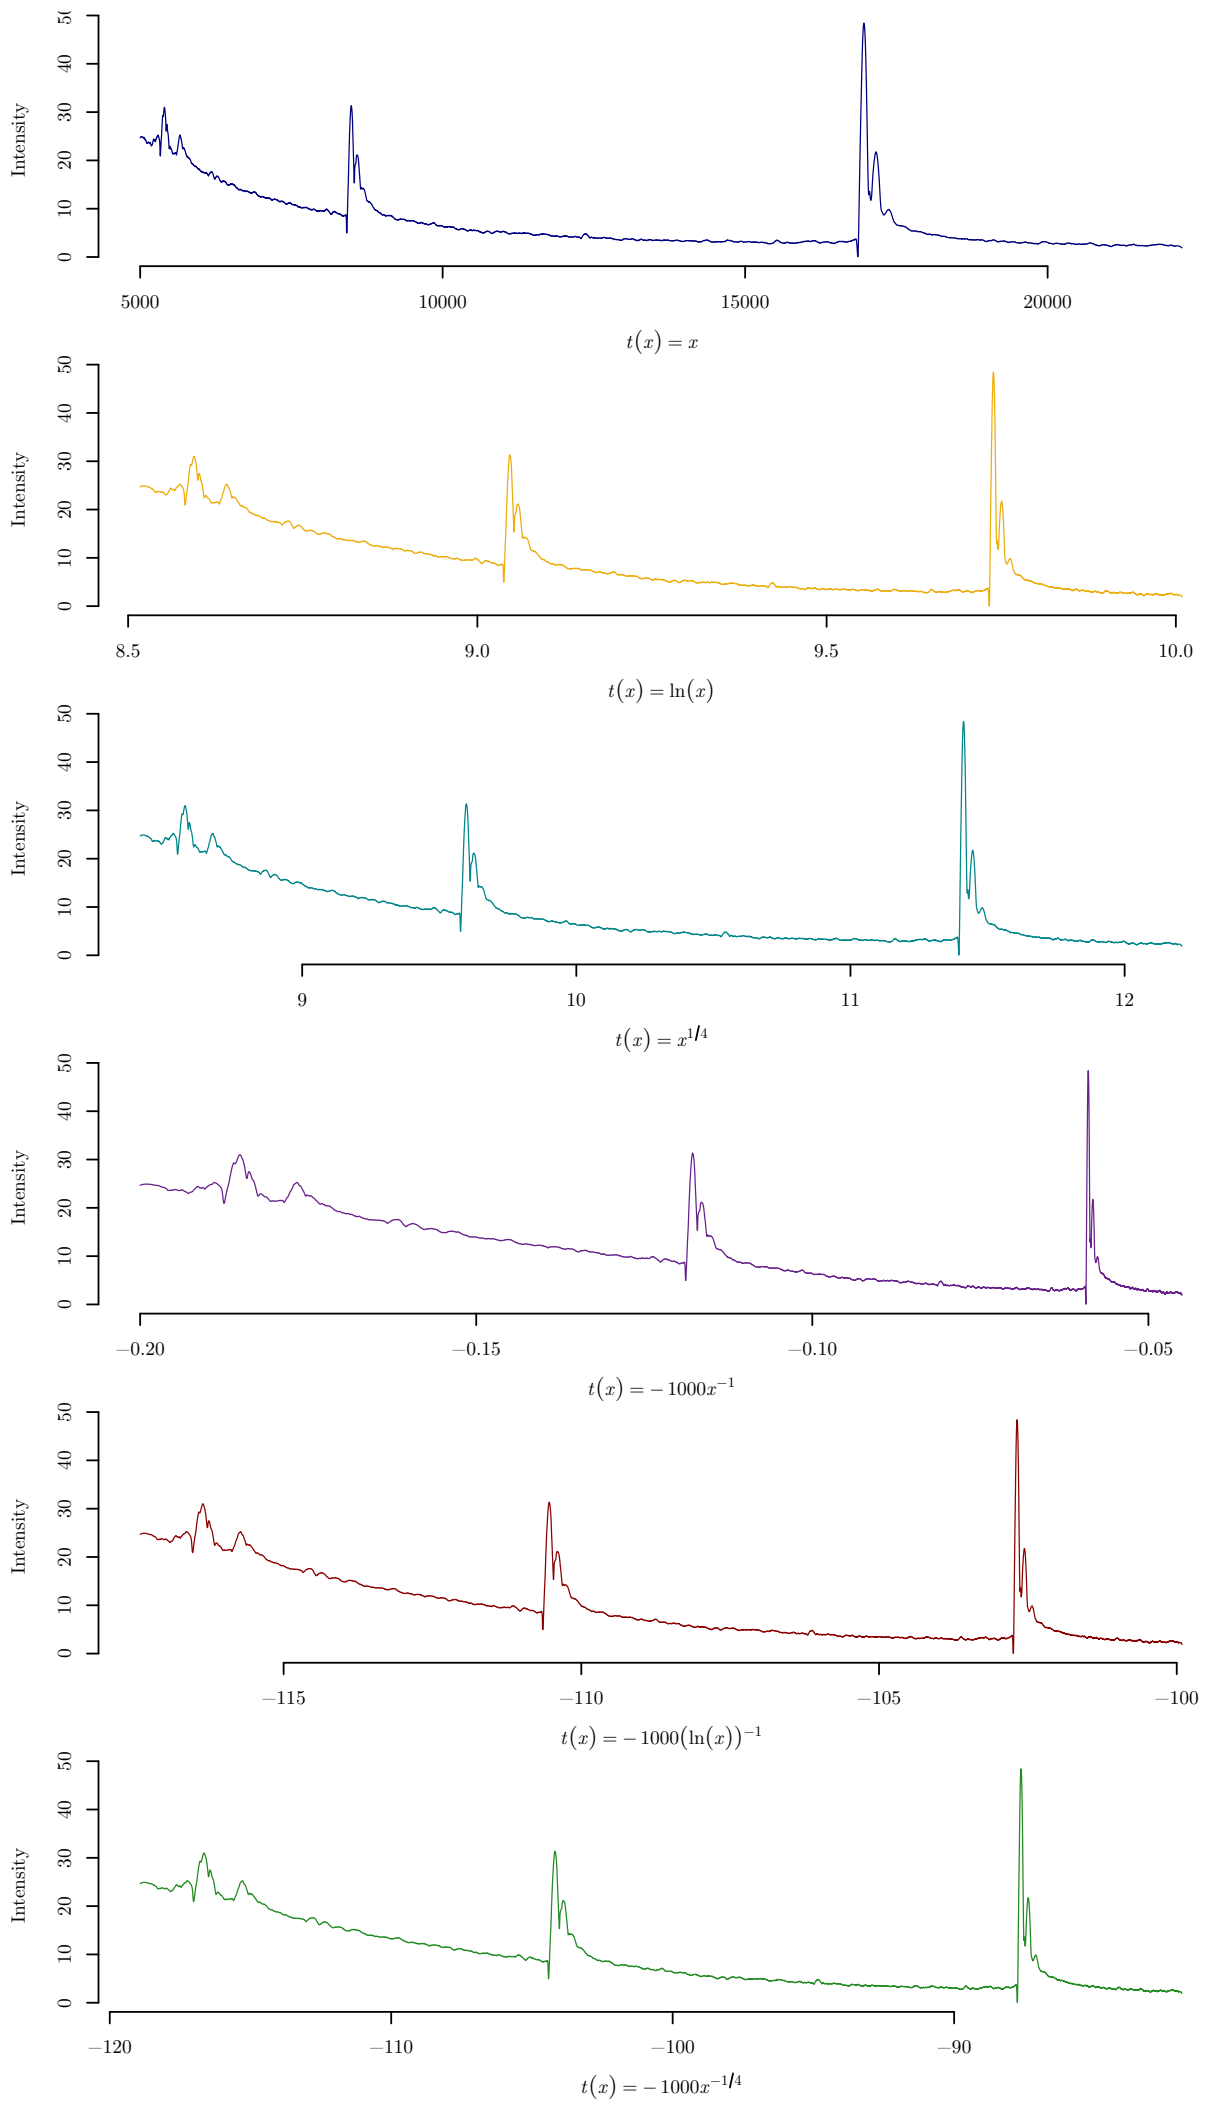

**Figure 6:** The effect of the six transformation functions,  $t_0$ - $t_5$ , on a spectrum from the Mantini dataset.
