# Supplementary material for: Informed baseline subtraction of proteomic mass spectrometry data aided by a novel sliding window algorithm
Source: PubMed Central journal article supplement (PMC5142289; doi:10.1186/s12953-016-0107-8), 2016-12-07
Supplement: 12953_2016_107_MOESM4_ESM.pdf [file 12953_2016_107_MOESM4_ESM.pdf]

## Examples of the CLSA on continuous data

To illustrate how the CLSA works, consider two cases of the algorithm in returning the erosion in Figures 1 and 2.

Figure 1 shows a case where  $\epsilon_B(f)(x_{12}) = 3$  using a SE of size  $k = 3$ . It can be seen that,

$$\theta_{w_{i_2}^{\nabla}-1} = \theta_{10} = 3 \neq \theta_{w_{i_2}^{\Delta}} = \theta_{13} = 4,$$

but,

$$\theta_{w_{i_2}^{\nabla}} = \theta_{11} = 3 = \theta_{w_{i_2}^{\Delta}+1} = \theta_{14}.$$

Therefore the desired result is also achieved using the CLSA as,

$$r_{\min}(f(x_{12})) = g(x_{w_{i_2}^{\Delta}}) = g(x_{13}) = 3 = \epsilon_B(f)(x_{12}).$$

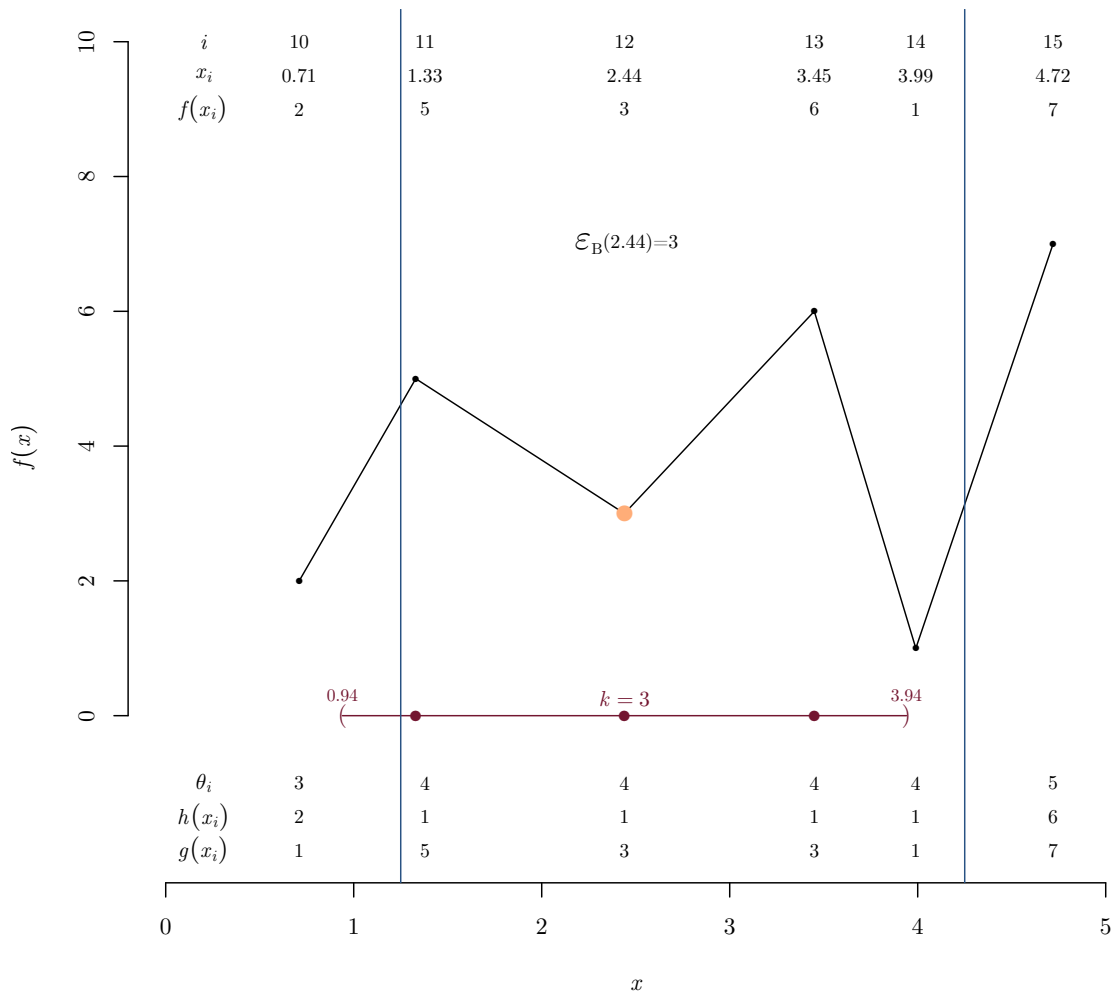

**Figure 1:** An example of data for  $x_i = x_{12} = 2.44$  and  $k = 3$  where  $\theta_{w_{i_2}^{\nabla}} = \theta_{w_{i_2}^{\Delta}+1}$  (i.e.  $\theta_{w_{i_2}^{\nabla}} = \theta_{w_{i_2}^{\Delta}+1} = 4$ ) and the computation required to return the result of the CLSA (the tan coloured point  $f(2.44) = 3$ ).

Figure 2 is a different case in the CLSA where  $\theta_{w_i^{\nabla}-1} = \theta_{w_i^{\Delta}}$ , as opposed to the case shown in Figure 1 where  $\theta_{w_i^{\nabla}} = \theta_{w_i^{\Delta}+1}$ . To obtain the erosion of point  $x_i = x_9 = 2.44$  for  $k = 3$  using the CLSA, observe that

$$\theta_{w_9^{\nabla}} = \theta_8 = 3 \neq \theta_{w_9^{\Delta}+1} = \theta_{11} = 4,$$

and

$$\theta_{w_9^{\nabla}-1} = \theta_7 = 3 = \theta_{w_9^{\Delta}} = \theta_{10}.$$

Therefore, the result of the CLSA erosion is

$$r_{\min}(f(x_9)) = h(x_{w_9^{\nabla}}) = h(x_8) = 3.$$

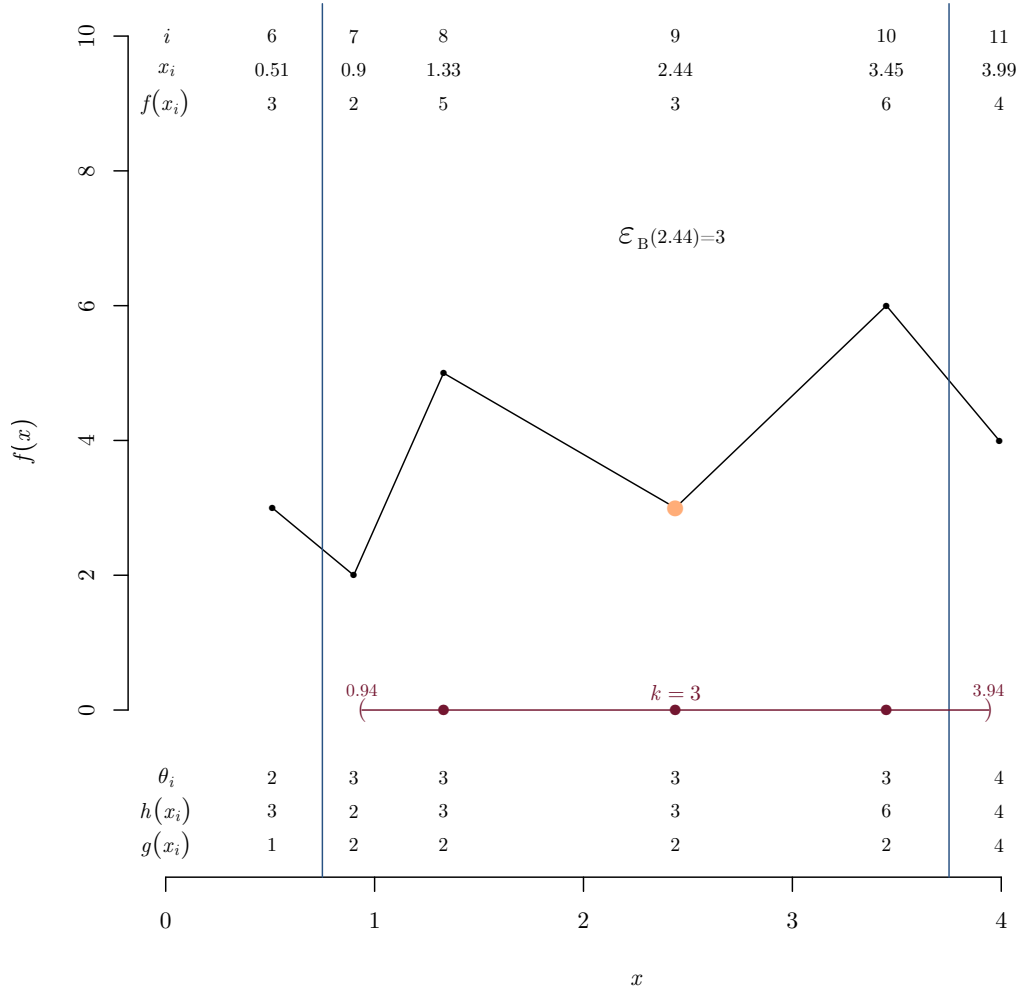

**Figure 2:** An example of data where  $\theta_{w_i^{\nabla}-1} = \theta_{w_i^{\Delta}}$  and the computation required for the continuous line segment algorithm.
